# Supplementary material for: Timeliness of Autism Spectrum Disorder Diagnosis and Use of Services Among U.S. Elementary School–Aged Children
Source: Atypon-hosted journal article supplement (doi:10.1176/appi.ps.201500549), 2016-08-01
Supplement: appi.ps.201500549.ds001.pdf [file appi.ps.201500549.ds001.pdf]

**Supplemental Figure 1.** Relationship between diagnostic delay and services receipt among children with functional limitations

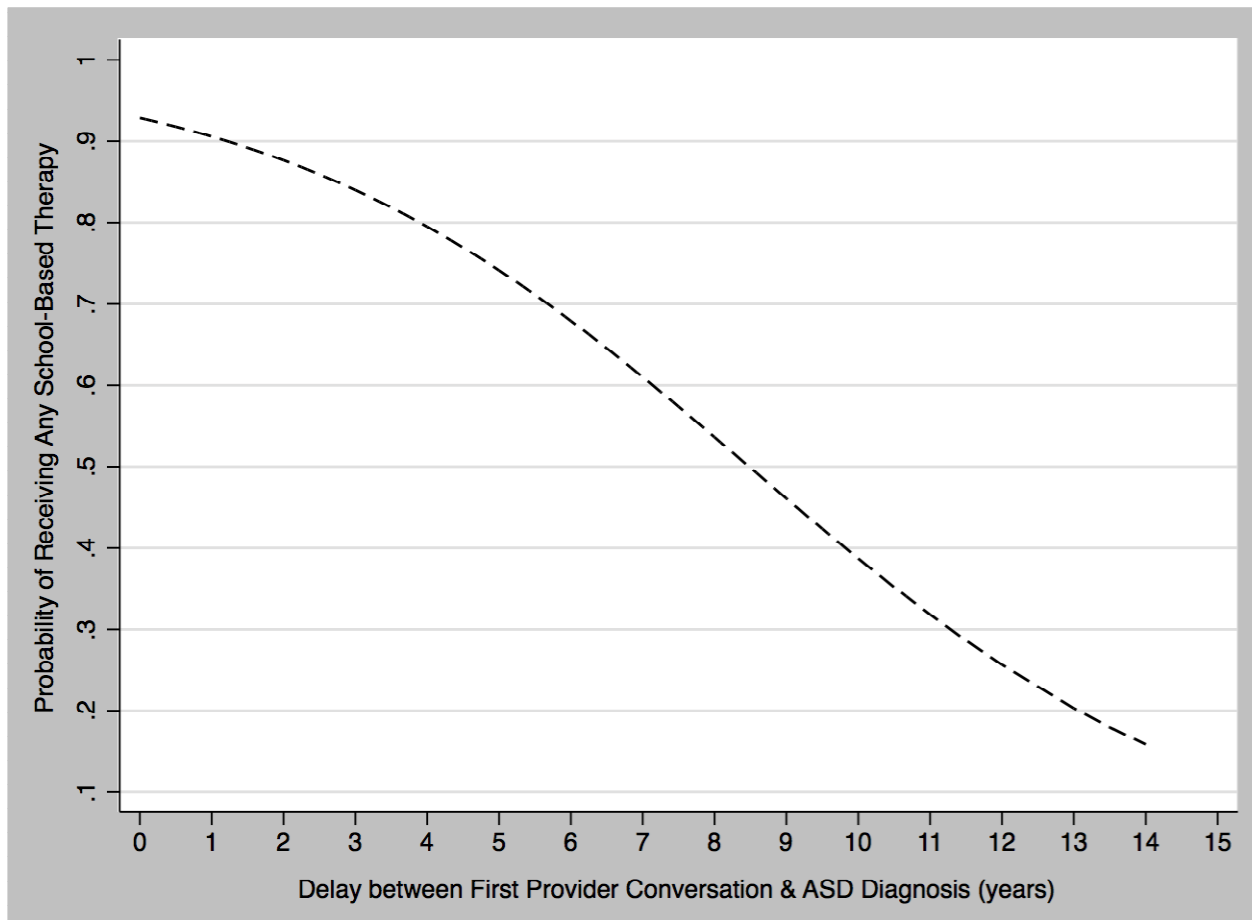

*Note:* 11 children with delays <0 years (parental concerns occurred after provider conversation) were excluded
